# Supplementary material
Source: ML conference proceedings conference paper supplement (https://proceedings.neurips.cc/paper_files/paper/2013/hash/ef575e8837d065a1683c022d2077d342-Abstract.html)
Supplement: Supplementary file [file ef575e8837d065a1683c022d2077d342-Supplemental.zip]

---

# Supplement to ‘Robust Data-Driven Dynamic Programming’

---

## Abstract

This supplement contains proofs and technical background material omitted from the main text.

## A Proofs

The following lemma constitutes a key ingredient for the proof of Theorem 4.1.

**Lemma A.1** *Select  $\mathbf{q} \in \Delta$  and  $\mathbf{v} \in \mathbb{R}^N$ , and define  $\Delta(\mathbf{q})$  as in (5). Then, the worst-case expectation  $\max_{\mathbf{p} \in \Delta(\mathbf{q})} \mathbf{v}^\top \mathbf{p}$  can be computed by solving the following tractable second-order cone program.*

$$\begin{aligned}
 \min \quad & \lambda\gamma - \mu - 2\mathbf{q}^\top \mathbf{y} + 2\lambda\mathbf{q}^\top \mathbf{1} \\
 \text{s. t.} \quad & \mu \in \mathbb{R}, \quad \lambda \in \mathbb{R}_+, \quad \mathbf{z}, \mathbf{y} \in \mathbb{R}^N \\
 & v_i \leq z_i, \quad z_i + \mu \leq \lambda, \quad \sqrt{4y_i^2 + (z_i + \mu)^2} \leq 2\lambda - z_i - \mu \quad \forall i
 \end{aligned} \tag{A.1}$$

**Proof:** Using the definition of  $\Delta(\mathbf{q})$  in (5), we can express the worst-case expectation problem as

$$\begin{aligned}
 \max_{\mathbf{p} \in \mathbb{R}_+^N} \quad & \mathbf{v}^\top \mathbf{p} \\
 \text{s. t.} \quad & \mathbf{1}^\top \mathbf{p} = 1, \quad \sum_{i=1}^N \frac{(p_i - q_i)^2}{p_i} \leq \gamma.
 \end{aligned} \tag{A.2}$$

The corresponding Lagrangian is given by

$$\mathcal{L}(\mathbf{p}, \lambda, \mu) = \lambda\gamma - \mu + \sum_{i=1}^N (v_i + \mu)p_i - \lambda \frac{(p_i - q_i)^2}{p_i}.$$

Next, we can use the Lagrangian to dualize (A.2),

$$\max_{\mathbf{p} \in \Delta(\mathbf{q})} \mathbf{v}^\top \mathbf{p} = \max_{\mathbf{p} \in \mathbb{R}_+^N} \min_{\mu \in \mathbb{R}, \lambda \in \mathbb{R}_+} \mathcal{L}(\mathbf{p}, \lambda, \mu) = \min_{\mu \in \mathbb{R}, \lambda \in \mathbb{R}_+} \max_{\mathbf{p} \in \mathbb{R}_+^N} \mathcal{L}(\mathbf{p}, \lambda, \mu),$$

where the second equality follows from strong duality, which holds as  $\mathbf{q}$  constitutes a Slater point in the relative interior of the primal problem’s feasible set. After some elementary manipulations we find that the optimal value of (A.2) is expressible as

$$\min_{\mu \in \mathbb{R}, \lambda \in \mathbb{R}_+} \lambda\gamma - \mu + \sum_{i=1}^N \max_{p_i \in \mathbb{R}_+} \left( (v_i + \mu)p_i - \lambda \frac{(p_i - q_i)^2}{p_i} \right). \tag{A.3}$$

Consider now the  $i$ th inner subproblem in (A.3). If  $q_i = 0$ , then the subproblem reduces to

$$\max_{p_i \in \mathbb{R}_+} (v_i + \mu - \lambda)p_i = \begin{cases} 0 & \text{if } \lambda - v_i - \mu \geq 0, \\ \infty & \text{otherwise.} \end{cases}$$

If  $q_i > 0$  and  $\lambda - v_i - \mu \geq 0$ , then the subproblem has the analytical solution  $p_i^* = q_i \sqrt{\lambda / (\lambda - v_i - \mu)}$  with corresponding optimal value  $2\lambda q_i - 2q_i \sqrt{\lambda(\lambda - v_i - \mu)}$ . On the other hand, if  $q_i > 0$  and  $\lambda - v_i - \mu < 0$ , the problem is unbounded. Substituting the explicit solutions of all subproblems into (A.3) shows that the optimal value of (A.2) is given by

$$\begin{aligned} \min_{\mu \in \mathbb{R}, \lambda \in \mathbb{R}_+} \quad & \lambda\gamma - \mu + 2\lambda \mathbf{q}^\top \mathbf{1} - 2 \sum_{i=1}^N q_i \sqrt{\lambda(\lambda - v_i - \mu)} \\ \text{s. t.} \quad & \lambda - v_i - \mu \geq 0 \quad \forall i. \end{aligned} \quad (\text{A.4})$$

It is now easy to see that problem (A.4) is equivalent to (A.1), and thus the claim follows.  $\blacksquare$

**Proof of Theorem 4.1:** The claim is an immediate consequence of Lemma A.1. Substituting (A.1) into the min-max problem (6) yields the desired result.  $\blacksquare$

**Proof of Corollary 4.1:** The claim follows from [1, Theorem 1], which asserts that the partial minimum (taken only with respect of a subset of all variables) of a convex function is convex.  $\blacksquare$

## B Specifics of the RDDP algorithm

This section addresses implementational details of the RDDP algorithm. In Section B.1 we outline a procedure for constructing sample trajectories of the endogenous state, and in Section B.2 we describe the selection of the algorithm's design parameters.

### B.1 Generating sample trajectories

The sample trajectories  $\{\mathbf{s}_t^k\}_{t=1}^T$ ,  $k = 1, \dots, K$ , which are needed as inputs for Algorithm 1, can be obtained by simulating a given policy along randomly selected exogenous state trajectories. Best results are achieved if the sample-generating policy is near-optimal. If no near-optimal policy is known, an initial naive policy can be improved sequentially in a greedy fashion [2]. For constrained linear-quadratic regulator (LQR) problems, we use the exact optimal policy of the corresponding *unconstrained* LQR problem as the initial policy. In all other cases, we start with a naive model predictive control policy. The underlying exogenous state trajectories (along which the endogenous state is simulated) are obtained from the historical trajectories  $\{\boldsymbol{\xi}_t^i\}_{t=1}^T$ ,  $i = 1, \dots, N$ , by allowing random inter-trajectory crossovers according to the conditional probabilities (3).

If the endogenous state has low dimension (e.g.,  $d_1 < 4$ ), the evaluation points  $\{\mathbf{s}_t^k\}_{t=1}^T$ ,  $k = 1, \dots, K$ , can be sampled uniformly from the set of all feasible endogenous states; see e.g. [3]. Similarly, if the control objective is to track a prescribed target, the evaluation points can be obtained by sampling states in the target's vicinity; see [2, Section 7].

### B.2 Parameter selection

The RDDP algorithm is parameterized by the level of robustness  $\gamma$ , the bandwidth matrix  $\mathbf{H}$  and the number of sample trajectories  $K$ . We choose  $\gamma$  via cross-validation from within the set  $\{0.1, 1, 10\}$ . Note that  $\gamma$  should decrease as the number of observation histories  $N$  grows. The matrix  $\mathbf{H}$  could also be obtained via cross-validation. However, we set  $\mathbf{H} = \text{diag}(h_1^2, \dots, h_{d_2}^2)$ , where

$$h_j = \hat{\sigma}_j \left( \frac{4}{N(d_2 + 2)} \right)^{\frac{1}{d_2 + 4}} \quad \forall j = 1, \dots, d_2,$$

and  $\hat{\sigma}_j$  denotes the (sample) standard deviation of the  $j$ -th component of the exogenous state. This choice of  $\mathbf{H}$  yields an asymptotically consistent estimator for the exogenous state distribution. Moreover, it minimizes the mean integrated square error if the exogenous state is Gaussian; see [4]. Finally, we choose  $K$  large enough to ensure that the approximate value function at the sample points does not change significantly (in terms of the  $\ell_2$ -norm) when new samples are added. The number of historical observations  $N$  can principally be selected in a similar manner as  $K$ . However, in practice we typically use all the available historical observations as  $N$  is assumed to be small.

## References

- [1] R.T. Rockafellar. *Conjugate Duality and Optimization*. SIAM, 1974.
- [2] A. Keshavarz and S. Boyd. Quadratic approximate dynamic programming for input-affine systems. *International Journal of Robust and Nonlinear Control*, 2012. Forthcoming.
- [3] L. Hannah and D. Dunson. Approximate dynamic programming for storage problems. In *Proceedings of the 28th International Conference on Machine Learning*, pages 337–344, 2011.
- [4] B. Silverman. *Density Estimation for Statistics and Data Analysis*. Chapman & Hall/CRC, 1986.
